# Supplementary material for: Genome-Wide Identification of the IQM Gene Family and Their Transcriptional Responses to Abiotic Stresses in Kiwifruit (Actinidia eriantha)
Source: MDPI journal article supplement (doi:10.3390/genes15020147), 2024-01-23
Supplement: s1 [file s1]

# Supplementary Materials

## Genome-Wide Identification of the *IQM* Gene Family and Their Transcriptional Responses to Abiotic Stresses in Kiwifruit

Minyan Xu 1, Zhi Zhang 1, Chengcheng Ling 1,2, Yuhuan Jiao 1 and Xin Zhang 1,\*

1 National Engineering Laboratory of Crop Stress Resistance Breeding, School of Life Sciences, Anhui Agricultural University, Hefei 230036, China

2 College of Food and Bioengineering, Bengbu University, Bengbu 233030, China

\* Correspondence: xinzhang@ahau.edu.cn

**Table S1.** All primers used for qRT-PCR and vector construction.

| Primer name      | Sequence (5' to 3')                            | T <sub>m</sub><br>(°C) | Amplification<br>temperature<br>(°C) | Final<br>concentration<br>(μM) |
|------------------|------------------------------------------------|------------------------|--------------------------------------|--------------------------------|
| AeActin1-qF      | CTTACAGAGGCACCACTCAACC                         | 58                     | 60                                   | 0.25                           |
| AeActin1-qR      | ATAGATGGGGACCGTGTGACT                          | 58                     | 60                                   | 0.25                           |
| AeIQM1-qF        | TTGATGGACCTACCCACG                             | 56                     | 60                                   | 0.25                           |
| AeIQM1-qR        | CCCTTACACACCCGATGCGT                           | 63                     | 60                                   | 0.25                           |
| AeIQM2-qF        | ACGTGGAAGCCTCAGTGTTT                           | 59                     | 60                                   | 0.25                           |
| AeIQM2-qR        | TCGAGTGCCCGGAATTGTAG                           | 59                     | 60                                   | 0.25                           |
| AeIQM3-qF        | CTGAAGCGCCTGTGTTTGAC                           | 58                     | 60                                   | 0.25                           |
| AeIQM3-qR        | GTAGTTCCTCACGCACCCAA                           | 58                     | 60                                   | 0.25                           |
| AeIQM4-qF        | ACACGAAGAAACCTTGCGGA                           | 59                     | 60                                   | 0.25                           |
| AeIQM4-qR        | TTTCCCACTTTGGCAGCTCT                           | 59                     | 60                                   | 0.25                           |
| AeIQM5-qF        | AGCATTCGAGCTTCTTGCT                            | 59                     | 60                                   | 0.25                           |
| AeIQM5-qR        | GACCGCCTTTAGGATGCCTT                           | 59                     | 60                                   | 0.25                           |
| AeIQM6-qF        | CCGAGAACTCCTCCAACACC                           | 59                     | 60                                   | 0.25                           |
| AeIQM6-qR        | GAGATCCGACGAAGGTGGTG                           | 59                     | 60                                   | 0.25                           |
| AeIQM7-qF        | GAAGCTGTTGGACTTTGCCG                           | 59                     | 60                                   | 0.25                           |
| AeIQM7-qR        | CGTGAAATTGCGGTCTCGTG                           | 59                     | 60                                   | 0.25                           |
| AeIQM8-qF        | ACGCATCGCAATCACAACAG                           | 59                     | 60                                   | 0.25                           |
| AeIQM8-qR        | CCCCAGTTTGTTGTGCACC                            | 60                     | 60                                   | 0.25                           |
| AeIQM9-qF        | GACACGAGGATTATTAGCGATTCT                       | 57                     | 60                                   | 0.25                           |
| AeIQM9-qR        | GGGCTTTATTGTGGTCTTTAGG                         | 57                     | 60                                   | 0.25                           |
| AeIQM10-qF       | AAGAGTGCCCGAGATCATGG                           | 59                     | 60                                   | 0.25                           |
| AeIQM10-qR       | CCATAAGTCGTCCAGCAGCT                           | 58                     | 60                                   | 0.25                           |
| AeIQM1-pYES2NB-F | cgataaggtacctaaggatccATGGGTTTTTGAAAGAAGATTCC   | 68.2                   | 58                                   | 0.25                           |
| AeIQM1-pYES2NB-R | tgctggatatctgcagaattcATGAACAGTTGAAGCAGCAACCT   | 67.6                   | 58                                   | 0.25                           |
| AeIQM4-pYES2NB-F | cgataaggtacctaaggatccATGGGCTTATCCCTATCCTTACTTC | 69.6                   | 58                                   | 0.25                           |
| AeIQM4-pYES2NB-R | tgctggatatctgcagaattcGCCAGAGGTGGGGATGGG        | 71                     | 58                                   | 0.25                           |
| AeIQM5-pYES2NB-F | cgataaggtacctaaggatccATGGGGATATCCTTTTCGTGC     | 68.4                   | 58                                   | 0.25                           |
| AeIQM5-pYES2NB-R | tgctggatatctgcagaattcCCGTATTCTCGTGGGGTCATG     | 69.4                   | 58                                   | 0.25                           |
| AeIQM6-pYES2NB-F | cgataaggtacctaaggatccATGGAGATCGAGACTCAAACGC    | 69.9                   | 58                                   | 0.25                           |
| AeIQM6-pYES2NB-R | tgctggatatctgcagaattcGACAGCAAACGACGACTGGC      | 69.9                   | 58                                   | 0.25                           |
